# Supplementary material for: LMTK3 confers chemo-resistance in breast cancer
Source: PubMed Central journal article supplement (PMC5992129; doi:10.1038/s41388-018-0197-0), 2018-03-15
Supplement: 41388_2018_197_MOESM1_ESM.pdf [file 41388_2018_197_MOESM1_ESM.pdf]

# Supplementary Figure 1

**A**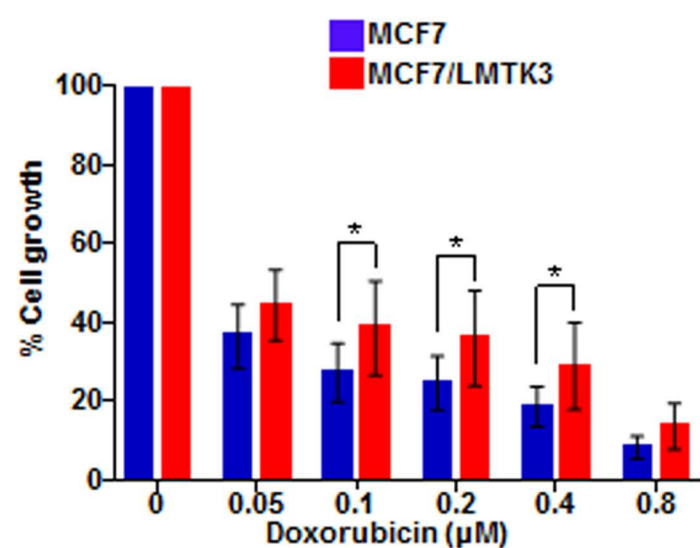**B**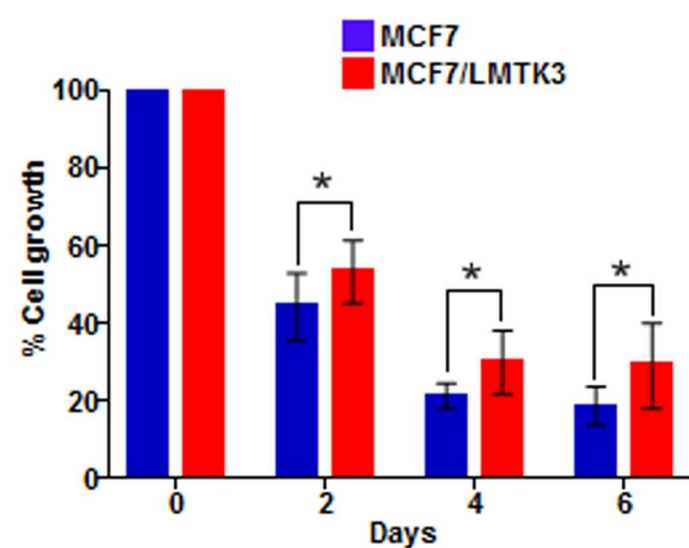**C**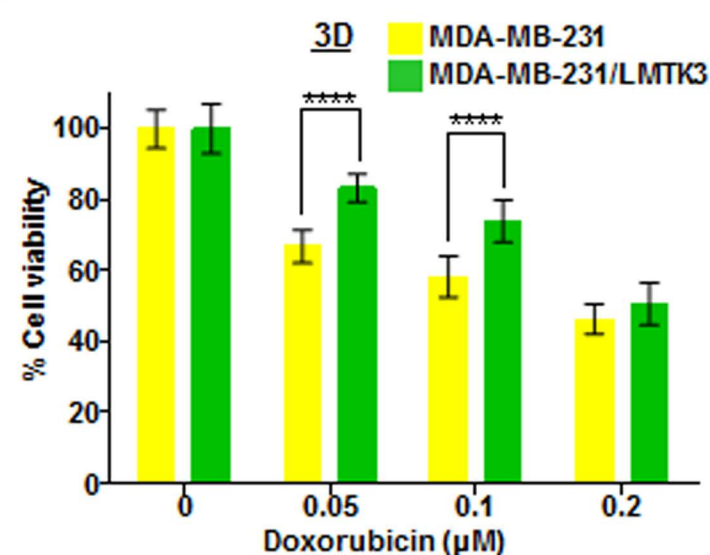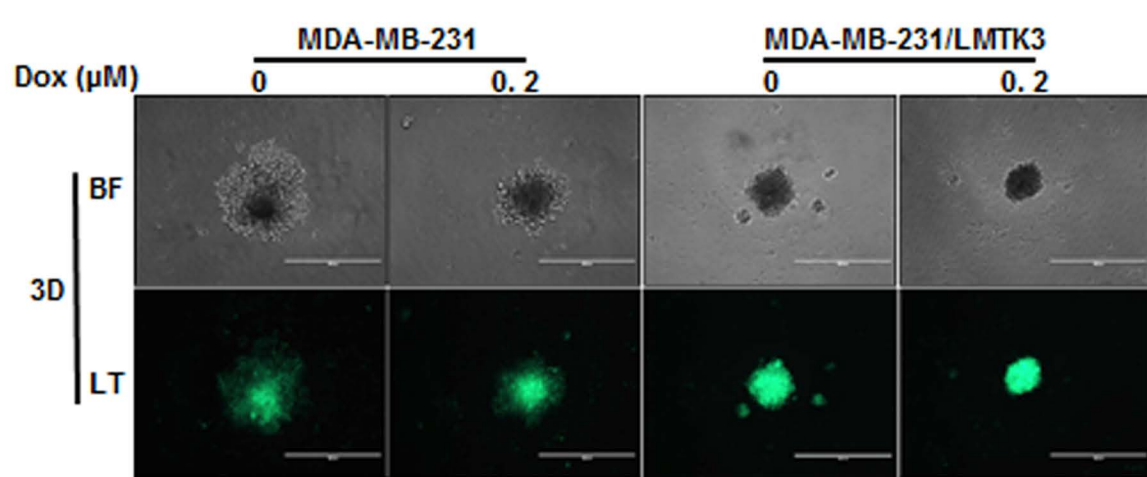**D**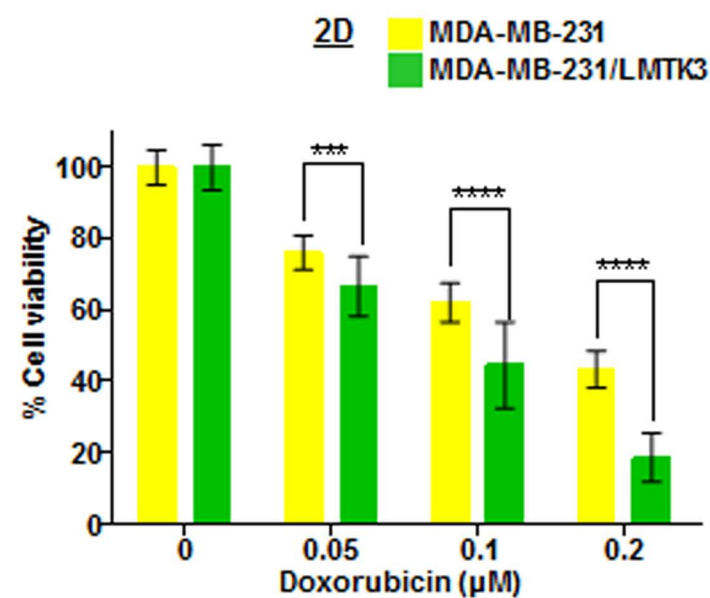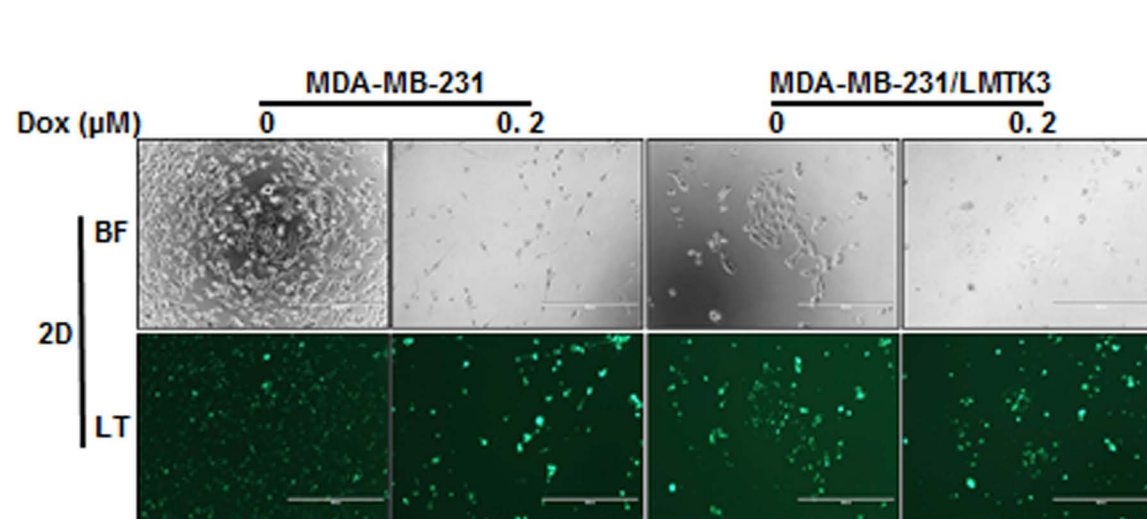

# Supplementary Figure 2

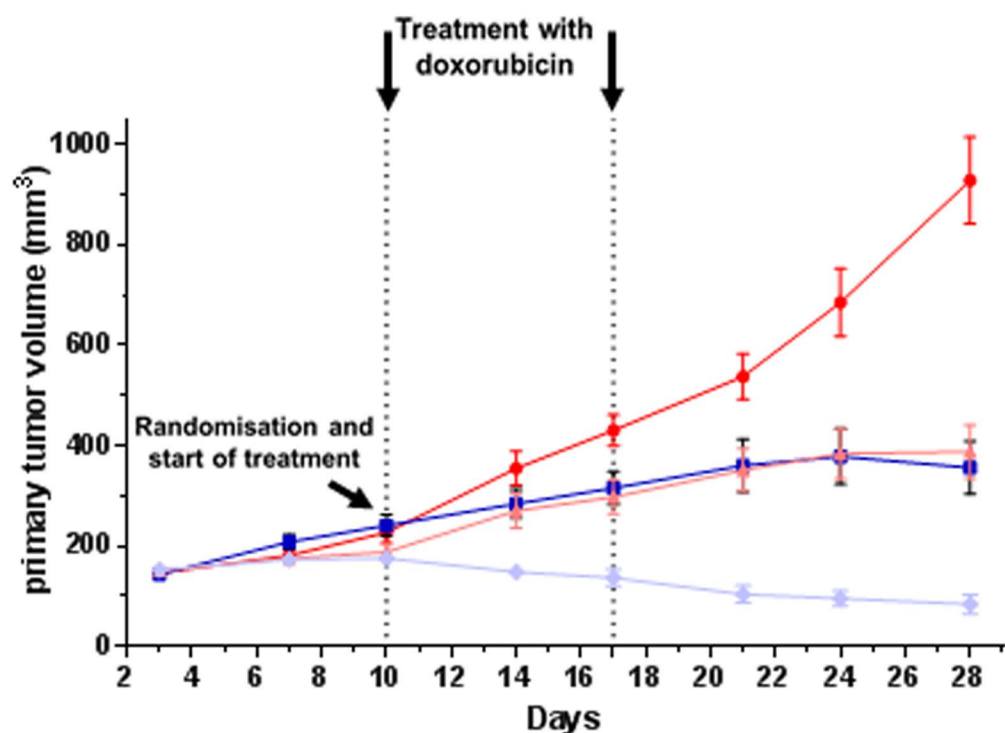

- Group 1:  $5 \times 10^6$  MCF7 cells implanted sc. on day 0 (n=10)
- Group 2:  $5 \times 10^6$  MCF7 cells cells implanted sc. on day 0; 8mg/kg Doxorubicin i.v. on days 10 and 17 (n=10/7)
- Group 3:  $5 \times 10^6$  MCF7/LMTK3 cells implanted sc. on day 0 (n=10)
- Group 4:  $5 \times 10^6$  MCF7/LMTK3 cells implanted sc. on day 0; 8mg/kg Doxorubicin i.v. on days 10 and 17 (n=10/9)

# Supplementary Figure 3

**A**

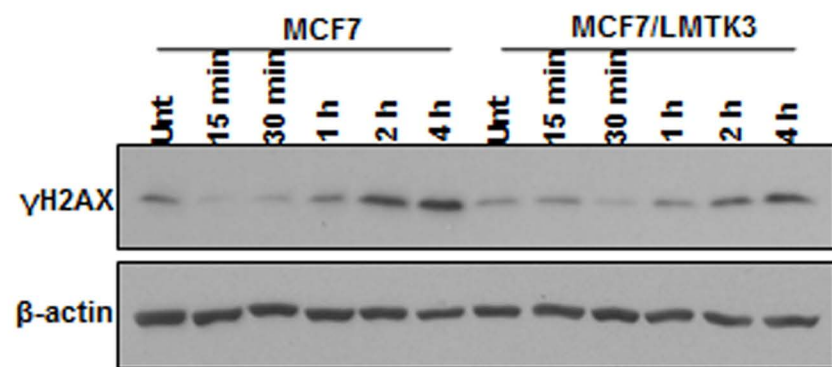

**B**

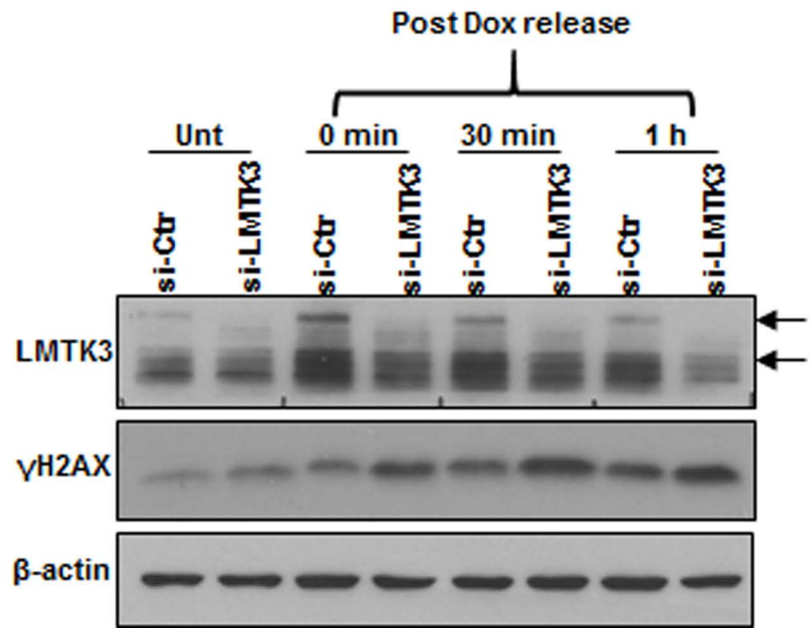

# Supplementary Figure 4

## Principal Component Analysis & Sample Clustering Plot Assessing Overall Similarity Between Samples

A

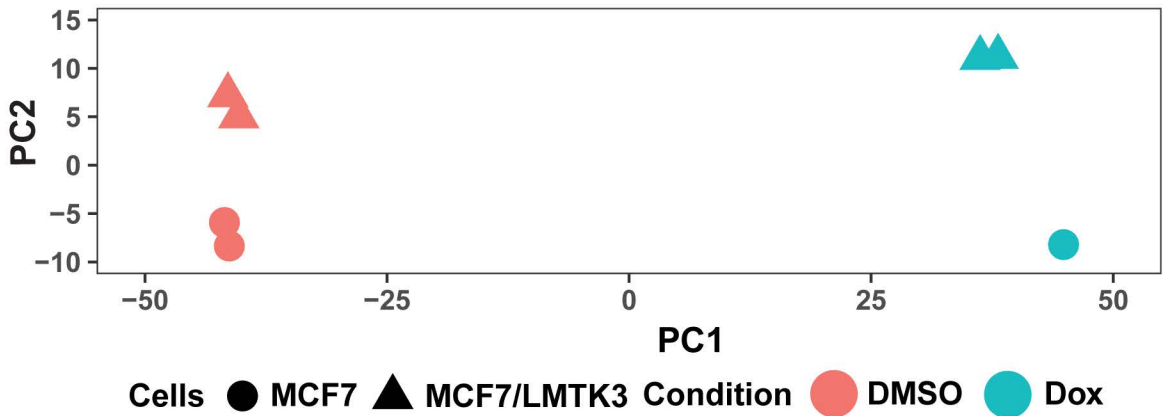

B

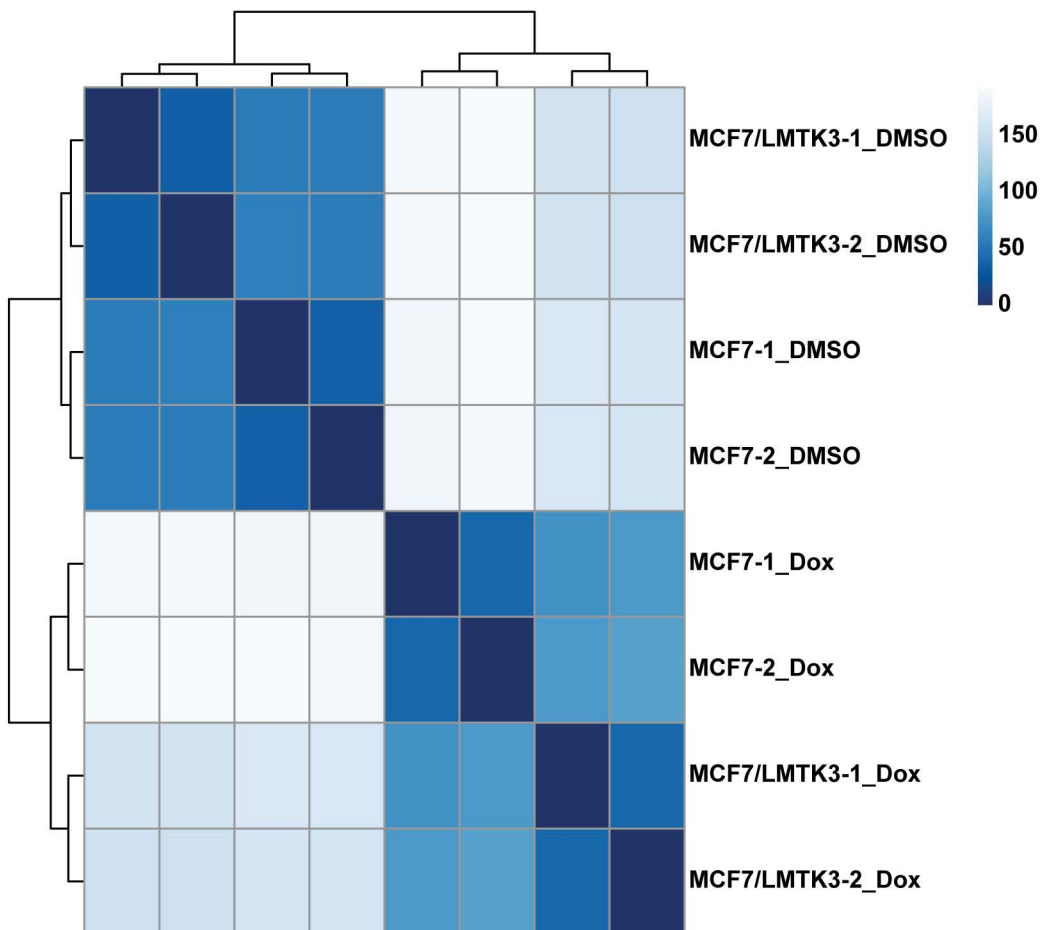

# Supplementary Figure 5

## IPA Upstream Regulators

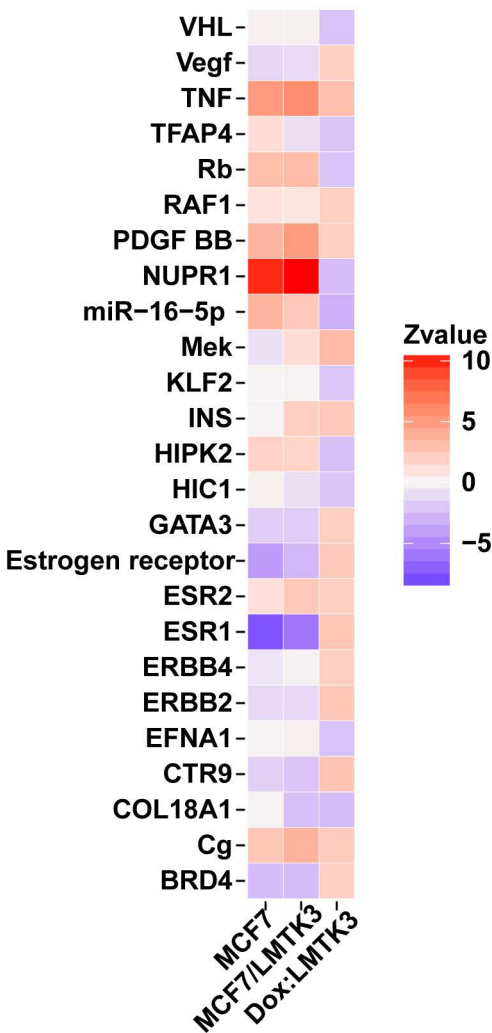

## Supplementary Figure Legends

### Supplementary Figure 1. LMTK3 over-expression decreases doxorubicin-induced cytotoxicity.

The percentage (%) of growth was evaluated by SRB assay in MCF7 and MCF7/LMTK3 cells, following treatment with: **(A)** different concentrations of doxorubicin (0.05, 0.1, 0.2, 0.4 and 0.8  $\mu\text{M}$ ) for 6 days; **(B)** 0.8  $\mu\text{M}$  of doxorubicin for different time points (2, 4, 6 days).

Following treatment with different concentrations of doxorubicin (0.05, 0.1 and 0.2  $\mu\text{M}$ ) for 72 h, the percentage (%) of cell viability, was assessed by CellTiter-Glo assay in MDA-MB-231 and MDA-MB-231/LMTK3 cells cultured in either **(C)** 3D (spheroids) or **(D)** 2D (monolayers). All error bars represent the mean  $\pm$  the SD from 3 independent experiments (\*  $P \leq 0.05$ , \*\*\*  $P \leq 0.001$ , \*\*\*\*  $P \leq 0.0001$ ).

### Supplementary Figure 2. *In vivo* monitoring of xenograft tumor growth.

MCF7 (Groups 1-2) and MCF7/LMTK3 (Groups 3-4) tumor cells, respectively, were implanted s.c. on day 0. After randomization on day 10, treatment with Doxorubicin was initiated in case of Groups 2 and 4, whereas Groups 1 and 3 were kept untreated. During the course of the study, the growth of the subcutaneously implanted primary tumors was determined twice weekly by caliper measurement. Data are displayed as means  $\pm$  SEM.

### Supplementary Figure 3. LMTK3 levels affect $\gamma\text{H2AX}$ phosphorylation following doxorubicin treatment.

**(A)** MCF7 and MCF7/LMTK3 cells were treated with 1  $\mu\text{M}$  of doxorubicin for different time points and Western blot analysis for endogenous  $\gamma\text{H2AX}$  levels was performed. **(B)** MCF7 cells were transfected with either LMTK3 small interfering RNA (siRNA) (siLMTK3) or with a non-targeting control siRNA (siControl) for 72 h. Cells were then treated with 1  $\mu\text{M}$  of doxorubicin. After 2 h of treatment, cells were washed and cultured in complete media. Cells were harvested at the indicated times and analysed by Western blot with the respective antibodies.  $\beta$ -actin was used as loading control.

**Supplementary Figure 4. (A)** Principal Component Analysis (PCA) performed using DESeq2 rLog-normalized RNAseq data. Loadings for principal components 1 (PC1) and PC2 are reported in the graph. **(B)** Hierarchical clustering analyses performed using DESeq2 rLog-normalized RNAseq data. Color code from white to dark blue refers to the distance metric used for clustering, with dark blue referring to maximum of correlation values.

**Supplementary Figure 5.** Heatmaps comparing Z scores of upstream regulators whose downstream target genes were differentially regulated ( $Z$  score  $\geq |2.0|$  &  $P \leq 0.05$ ) by doxorubicin in MCF7 and MCF7/LMTK3 cells. The significance P values were calculated by Fisher's exact test. The activation or inhibition of the canonical pathways and disease bio functions is defined by Z score. A Z score of  $\geq 2$  is considered as significant activation and a Z score of  $\leq -2$  is considered as significant inhibition. The Z score between (0,2) or (-2,0) represents trend towards activation or inhibition respectively.
