# Supplementary material for: LMTK3 confers chemo-resistance in breast cancer
Source: PubMed Central journal article supplement (PMC5992129; doi:10.1038/s41388-018-0197-0), 2018-03-15
Supplement: 41388_2018_197_MOESM2_ESM.pdf [file 41388_2018_197_MOESM2_ESM.pdf]

## Supplementary Tables

Supplementary Table 1

|                      |        | <b><math>\gamma</math>H2AX foci count</b> |                   |
|----------------------|--------|-------------------------------------------|-------------------|
| <b>Dox treatment</b> | Time   | <b>MCF7</b>                               | <b>MCF7/LMTK3</b> |
|                      | 30min  | 14.66 $\pm$ 1.25                          | 14.44 $\pm$ 1.02  |
|                      | 60min  | 22.90 $\pm$ 2.09                          | 20.30 $\pm$ 1.67  |
|                      | 90min  | 36.98 $\pm$ 1.58                          | 30.24 $\pm$ 1.53  |
|                      | 120min | 51.42 $\pm$ 1.64                          | 35.98 $\pm$ 1.57  |

|                           |         | <b><math>\gamma</math>H2AX foci count</b> |                   |
|---------------------------|---------|-------------------------------------------|-------------------|
| <b>Post Dox treatment</b> | Time    | <b>MCF7</b>                               | <b>MCF7/LMTK3</b> |
|                           | 30min   | 45.77 $\pm$ 2.01                          | 41.84 $\pm$ 1.79  |
|                           | 60min   | 40.88 $\pm$ 1.81                          | 48.58 $\pm$ 1.48  |
|                           | 90min   | 41.20 $\pm$ 1.25                          | 41.10 $\pm$ 2.26  |
|                           | 120min  | 42.00 $\pm$ 1.60                          | 36.34 $\pm$ 1.45  |
|                           | 240 min | 40.60 $\pm$ 1.44                          | 34.46 $\pm$ 1.50  |
|                           | 600 min | 24.44 $\pm$ 1.35                          | 18.32 $\pm$ 1.15  |

**Supplementary Table 1. LMTK3 over-expression impedes doxorubicin-induced  $\gamma$ H2AX phosphorylation.**

MCF7 and MCF7/LMTK3 cells were treated with 1  $\mu$ M of doxorubicin for 2 h and incubated for another 10 h in fresh complete media. Quantitative analysis of  $\gamma$ H2AX foci for different time points was performed.

**Supplementary Table 2**

| Time                     | % Tail DNA   |              |
|--------------------------|--------------|--------------|
|                          | MCF7         | MCF7/LMTK3   |
| Untreated                | 1.67 ± 0.26  | 1.85 ± 0.28  |
| 6 h<br>(post treatment)  | 21.71 ± 1.35 | 12.89 ± 1.10 |
| 24 h<br>(post treatment) | 12.10 ± 1.00 | 8.49 ± 0.80  |

**Supplementary Table 2. LMTK3 over-expression results in fewer DNA tail moments.**

Cells were treated with 1  $\mu$ M of doxorubicin for 2 h to induce DNA breaks. Following drug treatment, the media was removed and cells were incubated with fresh complete media for another 6 h and 24 h. Quantitative analysis of % tail DNA for different time points was performed.

**Supplementary Table 3.**

| Targets | RNAseq                               |                    | RT-PCR validation                    |                            |                      |
|---------|--------------------------------------|--------------------|--------------------------------------|----------------------------|----------------------|
|         | MCF7<br>(Doxo 0.5ug/ml) <sup>1</sup> | p-adj <sup>2</sup> | MCF7<br>(Doxo 0.5ug/ml) <sup>3</sup> | Std.<br>Error <sup>4</sup> | p-value <sup>5</sup> |
| LMTK3   | 1.12                                 | 8.17E-01           | 2.54                                 | 0.34                       | 1.05E-02             |
| POLG2   | 5.21                                 | 1.21E-123          | 2.28                                 | 0.24                       | 6.13E-03             |
| XIST    | -1.63                                | 3.25E-13           | -1.02                                | 0.45                       | 1.10E-02             |
| RPS19   | 2.41                                 | 3.04E-112          | 2.70                                 | 0.19                       | 7.81E-04             |
| CNR1    | 192.67                               | 2.68E-28           | 53.84                                | 7.15                       | 1.79E-03             |
| SOX6    | -5.66                                | 1.12E-07           | -6.80                                | 1.57                       | 7.58E-03             |
| HEY1    | 3.16                                 | 3.66E-04           | 3.69                                 | 1.09                       | 6.95E-02             |
| STMN1   | -1.88                                | 3.31E-37           | -16.30                               | 5.49                       | 3.44E-02             |
| NET1    | -5.24                                | 1.04E-231          | -6.56                                | 0.90                       | 1.08E-03             |
| HMGB2   | -1.92                                | 1.65E-34           | -0.44                                | 0.07                       | 3.64E-05             |
| KCNJ8   | -504.95                              | 3.48E-09           | -47.20                               | 14.10                      | 2.68E-02             |
| CYP1A1  | 44.32                                | 6.24E-18           | 5.21                                 | 0.58                       | 1.96E-03             |
| H1FO    | -5.31                                | 5.19E-241          | -2.49                                | 0.24                       | 1.25E-04             |
| TFAP2C  | 1.99                                 | 1.44E-61           | 3.16                                 | 0.16                       | 1.70E-04             |

**Supplementary Table 3. qRT-PCR validation of RNAseq data in MCF7 cells.**

RNAseq: <sup>1</sup>Average fold expression change (n=2) between MCF7 (Doxo 0.5ug/ml) and MCF7 (DMSO); <sup>2</sup>P-value corrected adjusted using *Benjamini-Hochberg procedure*. RT-PCR validation: <sup>3</sup>Average fold expression change (technical replicates=3; biological replicates= 3) between MCF7 (Doxo 0.5ug/ml) and MCF7 (DMSO); <sup>4</sup>Standard Error of mean calculated for n = 3; <sup>5</sup>P-value showing significance of fold expression changes calculated by RT-PCR.

**Supplementary Table 4.**

| Targets | RNAseq                                        |                            | RT-PCR validation                             |                            |                              |
|---------|-----------------------------------------------|----------------------------|-----------------------------------------------|----------------------------|------------------------------|
|         | MCF7/LMTK3<br>(Doxo<br>0.5ug/ml) <sup>1</sup> | <i>p</i> -adj <sup>2</sup> | MCF7/LMTK3<br>(Doxo<br>0.5ug/ml) <sup>3</sup> | Std.<br>Error <sup>4</sup> | <i>p</i> -value <sup>5</sup> |
| LMTK3   | 1.42                                          | 0.000415112                | 0.10                                          | 0.10                       | 8.99E-04                     |
| POLG2   | 1.36                                          | 4.69E-05                   | 1.79                                          | 0.81                       | 3.81E-01                     |
| XIST    | 3.27                                          | 0.434538878                | 3.80                                          | 3.18                       | 5.47E-01                     |
| RPS19   | 1.95                                          | 4.43E-66                   | 2.00                                          | 0.19                       | 5.83E-03                     |
| CNR1    | 190.02                                        | 2.48E-12                   | 34.07                                         | 8.16                       | 1.54E-02                     |
| SOX6    | 4.06                                          | 1.40E-42                   | 4.84                                          | 0.25                       | 9.79E-05                     |
| HEY1    | -2.16                                         | 0.022866463                | 1.68                                          | 0.29                       | 7.77E-02                     |
| STMN1   | -2.69                                         | 4.21E-86                   | -6.87                                         | 1.31                       | 3.89E-03                     |
| NET1    | -1.77                                         | 1.18E-32                   | -5.00                                         | 0.83                       | 1.98E-03                     |
| HMGB2   | -2.93                                         | 9.02E-88                   | 0.75                                          | 2.08                       | 9.11E-01                     |
| KCNJ8   | -13.09                                        | 6.25E-31                   | -308.24                                       | 210.55                     | 2.16E-01                     |
| CYP1A1  | 3.56                                          | 2.88E-21                   | 8.39                                          | 4.92                       | 2.07E-01                     |
| H1FO    | -1.93                                         | 6.18E-43                   | -5.79                                         | 1.88                       | 2.24E-02                     |
| TFAP2C  | 2.55                                          | 2.25E-113                  | 1.73                                          | 0.24                       | 4.07E-02                     |

**Supplementary Table 4. qRT-PCR validation of RNAseq data in MCF7/LMTK3 cells.** RNAseq: <sup>1</sup>Average fold expression change (n=2) between MCF7/LMTK3 (Doxo 0.5ug/ml) and MCF7/LMTK3 (DMSO); <sup>2</sup>*P*-value corrected adjusted using *Benjamini-Hochberg procedure*. RT-PCR validation: <sup>3</sup>Average fold expression change (technical replicates=3; biological replicates= 3) between MCF7/LMTK3 (Doxo 0.5ug/ml) and MCF7/LMTK3 (DMSO); <sup>4</sup>Standard Error of mean calculated for n = 3; <sup>5</sup>*P*-value showing significance of fold expression changes calculated by RT-PCR.

**Supplementary Table 5.**

| Gene             | Sequence                   |
|------------------|----------------------------|
| <i>SOX6-FP</i>   | GTCACCTTTCATGAATTCAAAGGCA  |
| <i>SOX6-RP</i>   | GCTTGCTTGGGAAGACATTCTTAAAT |
| <i>HEY1-FP</i>   | TAATTGAGAAGCGCCGACGA       |
| <i>HEY1-RP</i>   | GCTTAGCAGATCCTTGCTCCA      |
| <i>KCJN8-FP</i>  | GGAGTCCACTGTGTGTGTGA       |
| <i>KCJN8-RP</i>  | AAAACCGTGATGGCCAAAGG       |
| <i>CYP1A1-FP</i> | CCCCACAGCACAACAAGAGA       |
| <i>CYP1A1-RP</i> | CAGGGGTGAGAAACCGTTCA       |
| <i>H1F0-FP</i>   | TCAAGCAGACCAAAGGGGTG       |
| <i>H1F0-RP</i>   | TTTGGCGTGGCTACCTTCTT       |
| <i>NET1-FP</i>   | GAGCTGGACGGGAGATGTTC       |
| <i>NET1-RP</i>   | GGCTCCTTCAGATCAAGGCT       |
| <i>HMGB2-FP</i>  | CTCCAATACCCTCGGGTGA        |
| <i>HMGB2-RP</i>  | GCGTACGAGGACATTTTGCC       |
| <i>STMN1-FP</i>  | CCCACGAGGGTTCTTCTGTC       |
| <i>STMN1-RP</i>  | ACTGGGATAAGGAAAGTCCTGC     |
| <i>POLG2-FP</i>  | CTTCACCCTTGTTTAGCCCCT      |
| <i>POLG2-RP</i>  | AGCCCTTGACAAACCTGTCT       |
| <i>RPS19-FP</i>  | AGTCCCCGAATGGGTGGATA       |
| <i>RPS19-RP</i>  | CGCTGTGGAAGCAGCTCG         |
| <i>TFAP2C-FP</i> | GAAGAGGACTGCGAGGATCG       |
| <i>TFAP2C-RP</i> | GCTGATATTCGGCGACTCCA       |
| <i>NR4A2-FP</i>  | CTCCCAGAGGGAACCTGCAC       |
| <i>NR4A2-RP</i>  | GCCTGTCCAATCTCCTCCTTAG     |
| <i>LMTK3-FP</i>  | AATGTCTGCGTAACCGCACG       |
| <i>LMTK3-RP</i>  | GGCGAATCCATCGGGGTG         |
| <i>XIST-FP</i>   | GACACAAGGCCAACGACCTA       |
| <i>XIST-RP</i>   | TCGCTTGGGTCCTCTATCCA       |
| <i>CNR1-FP</i>   | TCGTTCTAGCGGACAACAG        |
| <i>CNR1-RP</i>   | AATCTCTTTGCCCTTCGCA        |

**Supplementary Table 5. Sequences of primers used for the qRT-PCR validation of RNA-Seq data.** FP: Forward primer; RP: Reverse primer.
